# Supplementary material
Source: Springer Nature journal article supplement (https://www.springermedizin.de/resource/supplementary/12995_2011_200_MOESM2_ESM.pdf/9622930)

**a)**

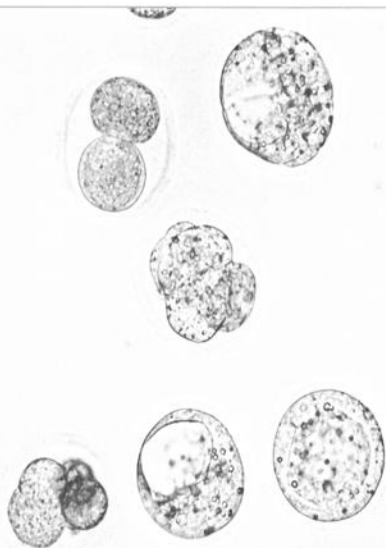

**b)**

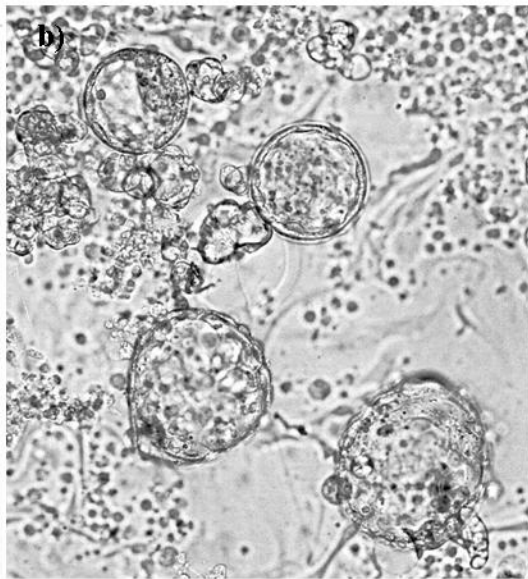

Supplement: MOESM2 [file 9622930]
